# The American Journal of Psychiatry

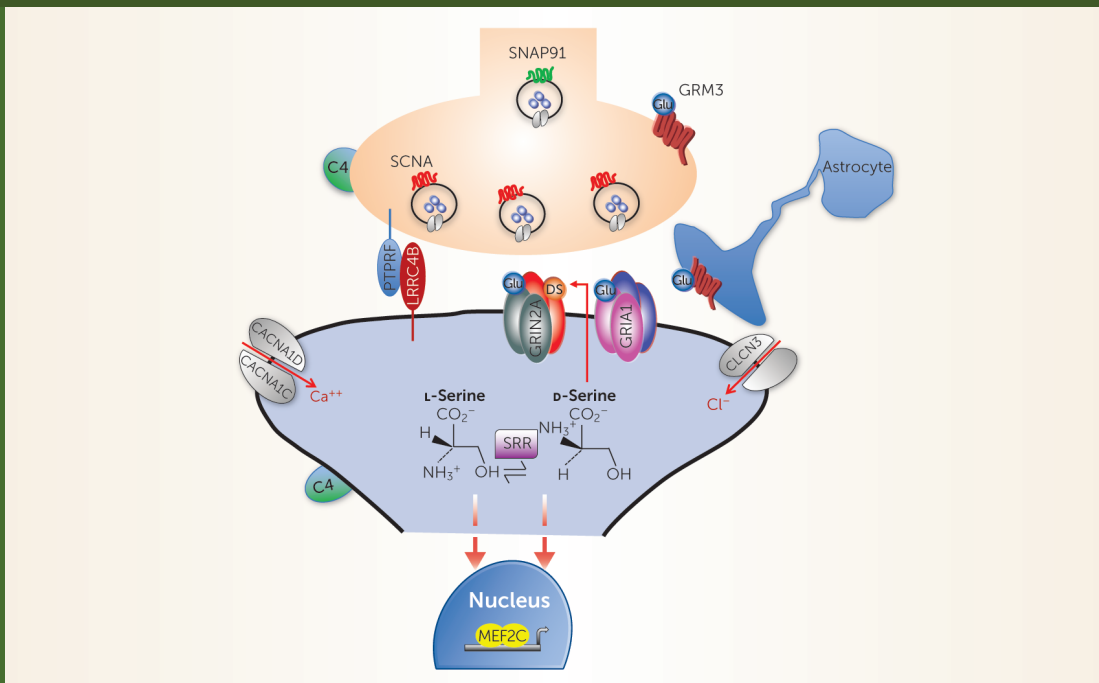

Fifty Years of Research on Schizophrenia: The Ascendancy  
of the Glutamatergic Synapse

Association of Missense Mutation in FOLH1 With Decreased NAAG  
Levels and Impaired Working Memory Circuitry and Cognition

Diagnosis- and Cell Type-Specific Mitochondrial Functional  
Pathway Signatures in Schizophrenia and Bipolar Disorder

Effects of Olanzapine Combined With Samidorphan on  
Weight Gain in Schizophrenia
